# Supplementary material for: Stroma remodeling and reduced cell division define durable response to PD-1 blockade in melanoma
Source: PubMed Central journal article supplement (PMC7015935; doi:10.1038/s41467-020-14632-2), 2020-02-12
Supplement: 41467_2020_14632_MOESM2_ESM.pdf [file 41467_2020_14632_MOESM2_ESM.pdf]

**Stroma remodeling and reduced cell division define durable response to PD-1 blockade in melanoma.**

Galvani, Mundra et al.

## Supplementary Figures

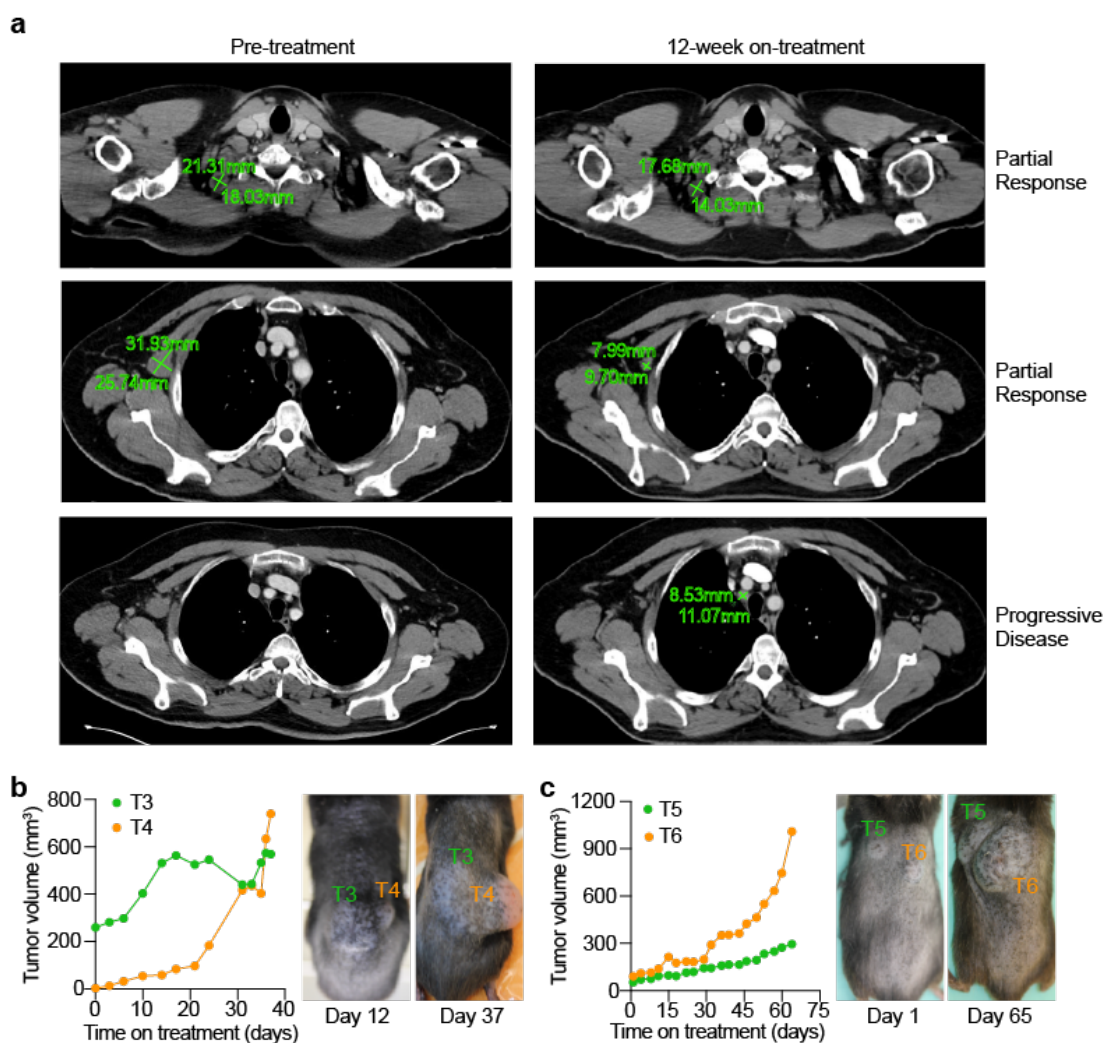

**Supplementary Figure 1. Mixed response to anti-PD-1 in BRAF<sup>V600E</sup> mice mirrors clinical response in melanoma patients.** **a** Computed tomography (CT) scans from a representative case of mixed patient response to treatment with first-line anti-PD-1. Images of the differentially responding metastases (partial responses in the right supraclavicular and right axillary nodes at the top, and progressive disease in a right paratracheal node at the bottom) were taken pre-treatment and at week 12 on-treatment. **b,c** Growth curves and photographs at different treatment times of representative mice exposed **b** or not **c** to ultraviolet radiation (UVR) and bearing multiple tumors with differential response to PD-1 blockade.

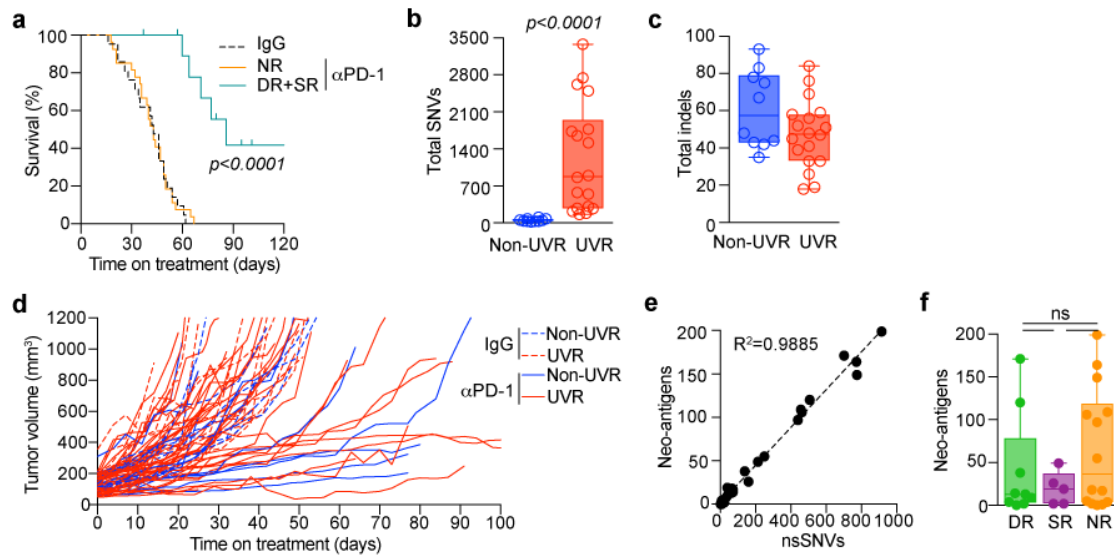

**Supplementary Figure 2. PD-1 blockade results in survival benefit in mice.** **a** Kaplan-Meier curves showing survival of animals treated with anti-PD-1, separated into non-responders (NR,  $n=27$  animals; orange line) or durable + short-lived response (DR+SR,  $n=11$  animals; green line), compared to IgG treated mice ( $n=21$  animals; black dotted line); censored mice in the anti-PD-1 responding group were sacrificed for reasons other than tumor growth. Two-sided log-rank test was performed to determine statistical difference between the survival curves. **b,c** Number of total single nucleotide variants (SNVs) **b** and indels **c** in non-UVR ( $n=10$  tumors) or UVR ( $n=18$  tumors) samples. Two-tailed Mann Whitney U test was performed to determine statistical difference between the groups. **d** Tumor growth curves from Fig. 1e colored according to exposure (red) or not (blue) to ultraviolet radiation (UVR). Line, single tumor. **e** Pearson correlation between number of non-synonymous (ns) SNVs and predicted neoantigens in  $n=28$  mouse tumors. Dot, single tumor; line, best fitted curve. **f** Number of predicted neoantigens in samples from DR (green,  $n=9$  tumors), SR (purple,  $n=5$  tumors) and NR (orange,  $n=14$  tumors). Two-tailed Mann Whitney U test was performed to determine statistical difference between the response groups. Dot, single tumor; hinges, 25<sup>th</sup> and 75<sup>th</sup> percentiles; middle line, median; whiskers, minimum to maximum value; ns, not significant.

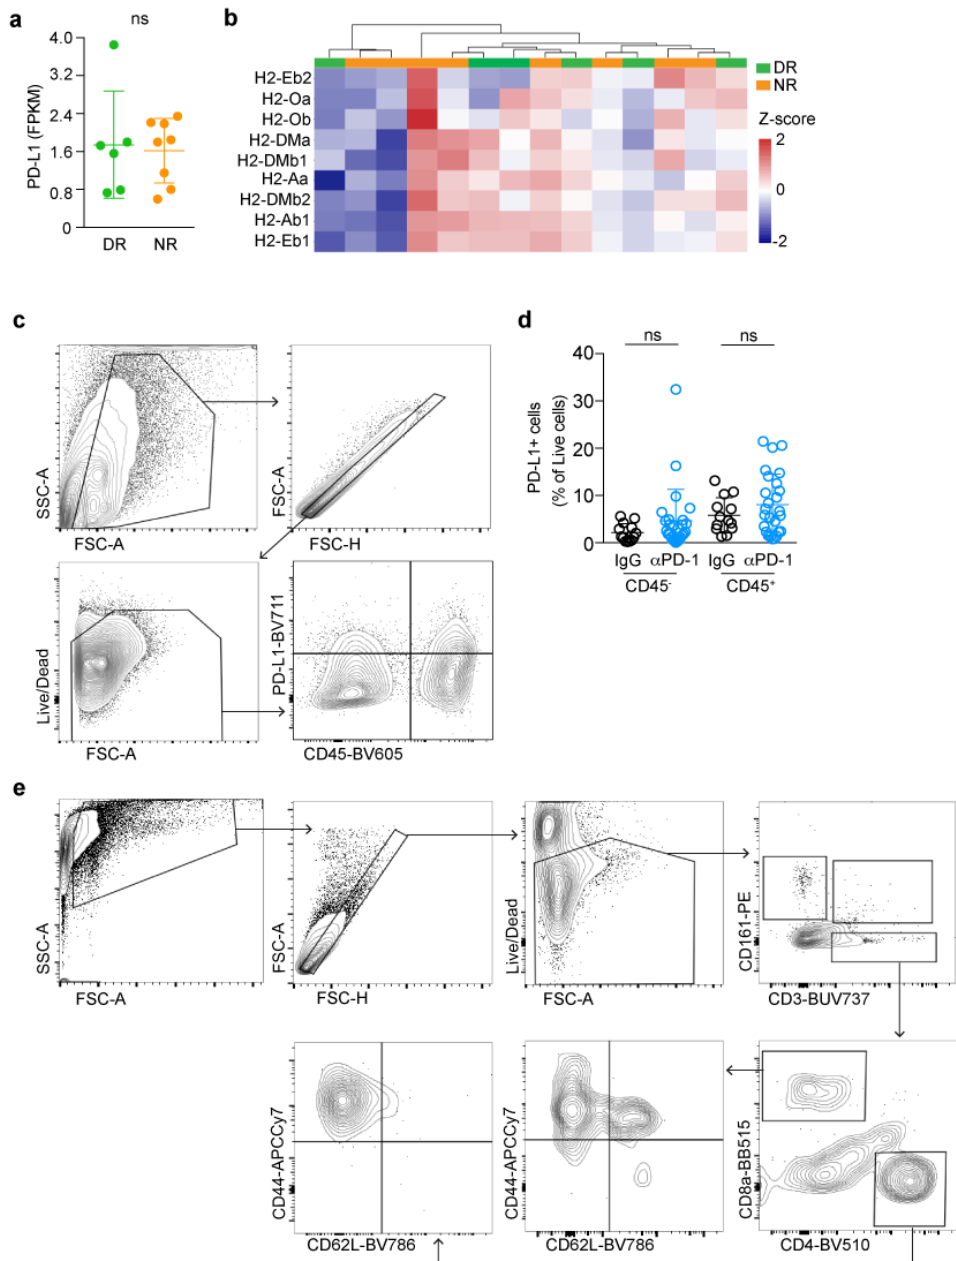

**Supplementary Figure 3. PD-L1 and MHC-II expression do not distinguish responding from non-responding melanoma in mice.** **a** PD-L1 gene expression in DR (green,  $n=6$  tumors) and NR (orange,  $n=8$  tumors) obtained from RNAseq. Two-tailed Mann Whitney U test was performed to determine statistical difference between the response groups. Dot, single tumor; line, mean; error bar, standard deviation; ns, not significant. **b** Heatmaps representing gene expression of several MHC-II molecules in DR (green,  $n=6$  tumors) and NR (orange,  $n=8$  tumors) from RNAseq. Row, gene; column, sample. **c** Gating strategy to determine the percentage of tumor cells ( $CD45^-$ ) and leucocytes ( $CD45^+$ ) expressing PD-L1. **d** Percentage of PD-L1 expressing tumor and immune cells in IgG ( $n=13$  tumors) and anti-PD-1 ( $n=26$  tumors) treated mice. Two-tailed Mann Whitney U test was performed to determine statistical difference between the treatment groups. Circle, single tumor; line, mean; error bar, standard deviation; ns, not significant. **e** Gating strategy to determine the percentage of T cells subgroups infiltrating the tumors in IgG ( $n=13$  tumors) and anti-PD-1 ( $n=26$  tumors) treated mice (Fig. 2a).

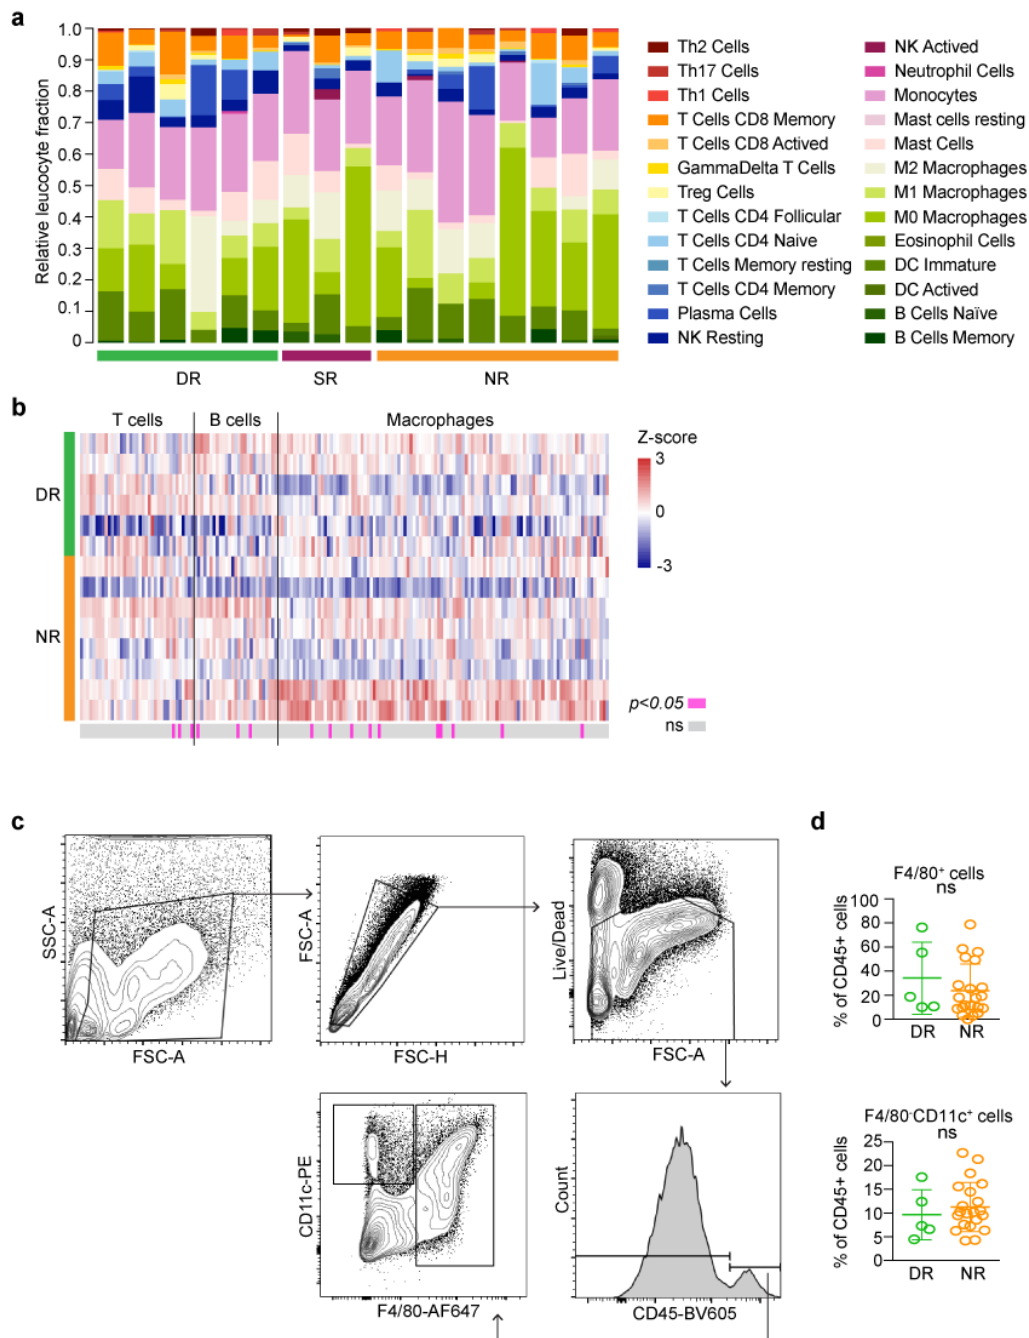

**Supplementary Figure 4. Tumor immune infiltrate does not correlate with response in mice.** **a** Relative abundance of 26 immune cell types from gene expression analysis by ImmuCC pipeline<sup>21</sup> in DR (green,  $n=6$  tumors), SR (purple,  $n=3$  tumors), and NR (orange,  $n=8$  tumors). Column, single tumor. **b** Heatmap representing the gene expression of lineage specific T cells, B cells and macrophage markers<sup>23</sup> in DR (green,  $n=6$  tumors) and NR (orange,  $n=8$  tumors). Significantly differentially expressed genes (pink,  $p < 0.05$ ) are highlighted using DESeq2 algorithm. Column, gene; row, single tumor. **c** Gating strategy to determine the percentage of tumor associated macrophages (F4/80<sup>+</sup>) and dendritic cells (F4/80<sup>+</sup>CD11c<sup>+</sup>) in mouse tumors. **d** Relative abundance of F4/80<sup>+</sup> (top) and F4/80<sup>+</sup>CD11c<sup>+</sup> (bottom) cells in DR (green,  $n=5$  tumors) or NR (orange,  $n=21$  tumors). Two-tailed Mann Whitney U test was performed to determine statistical difference between the response groups. Dot, single tumor; horizontal line, mean; error bar, standard deviation. ns, not significant.

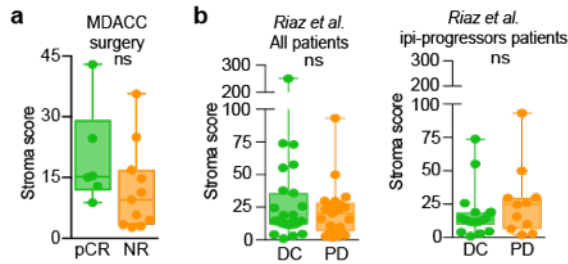

**Supplementary Figure 5. Changes in the stroma compartment correlate with response in first line ICI treated patients.** **a** Stroma score generated from the 10-gene CAF signature for melanoma samples from patients who received combination nivolumab+ipilimumab or nivolumab monotherapy in the neoadjuvant setting. RNAseq from samples obtained at the time of surgery in the MDACC cohort. Patients with pathologic complete response (pCR):  $n=6$  patients, green; non-responding patients (NR):  $n=11$  patients, orange. Two-tailed Mann Whitney U test was performed to determine statistical difference between the response groups. **b** Stroma score generated from the 10-gene CAF signature in the Riaz cohort<sup>18</sup> of melanoma patients with disease control (DC) or progressive disease (PD) on-treatment with anti-PD-1 (entire cohort on the left; DC,  $n=27$  patients; PD,  $n=21$  patients) or in patients who received prior treatment with ipilimumab (right; DC,  $n=18$  patients; PD,  $n=11$  patients). Two-tailed Mann Whitney U test was performed to determine statistical difference between the response groups. Dot, single tumor; hinges, 25<sup>th</sup> and 75<sup>th</sup> percentiles; middle line, median; whiskers, minimum to maximum value; ns, not significant.

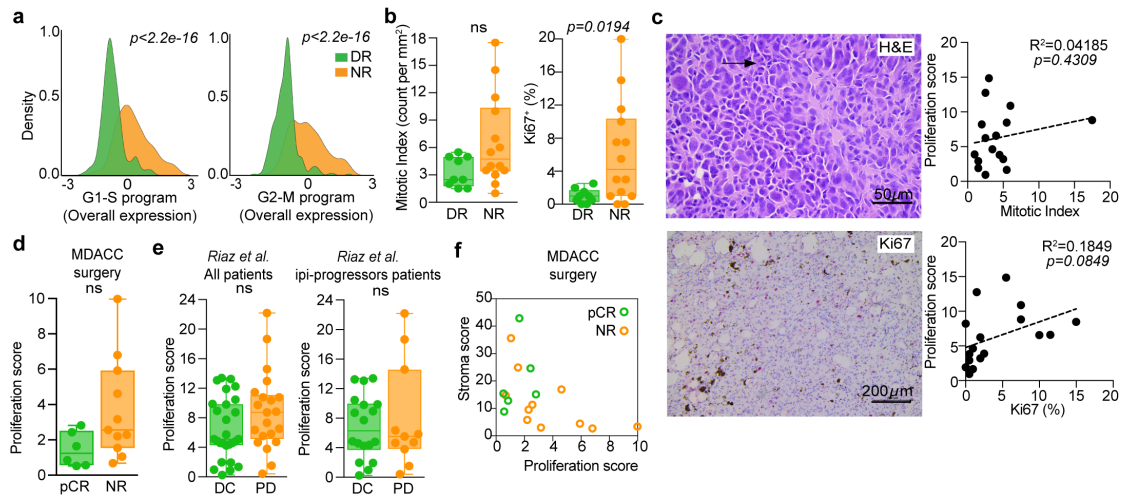

**Supplementary Figure 6. Common markers of proliferation do not segregate responders and non-responders to anti-PD-1 treatment.** **a** Overall gene expression profile of DR (green,  $n=6$  tumors) and NR (orange,  $n=8$  tumors) of the G1-S and G2-M programs<sup>23</sup>. The p-values are determined using Welch's two sample t-test. **b** Mitotic index (left) and percentage of Ki67 positive cells (right) in DR (green,  $n=9$  tumors) and NR (orange,  $n=14$  tumors) from mice treated with anti-PD-1 assessed in hematoxylin and eosin (H&E) or immunohistochemistry staining, respectively. Plotted values represent the mean of the scores obtained from two independent pathologists blinded to the tumor response to therapy. Two-tailed Mann Whitney U test was performed to determine statistical difference between the response groups. Dot, single tumor; hinges, 25<sup>th</sup> and 75<sup>th</sup> percentiles; middle line, median; whiskers, minimum to maximum value; ns, not significant. **c** Representative images of H&E and immunohistochemistry staining for the evaluation of mitotic index and Ki67 (in red), respectively (left). Pearson correlation (right) between mitotic index (top) or Ki67 positivity (bottom) and proliferation score for  $n=17$  tumors. Dot, single tumor; line, best fitted curve. **d** Proliferation score generated from the 7-gene signature for melanoma samples from patients who received the combination nivolumab+ipilimumab or nivolumab monotherapy in neoadjuvant setting. RNAseq from samples obtained at the time of surgery in the MDACC cohort. Patients with pathologic complete response (pCR):  $n=6$ , patients, green; non-responding patients (NR):  $n=11$  patients, orange. Two-tailed Mann Whitney U test was performed to determine statistical difference between the response groups. Dot, single tumor; hinges, 25<sup>th</sup> and 75<sup>th</sup> percentiles; middle line, median; whiskers, minimum to maximum value; ns, not significant. **e** Proliferation score generated from the 7-gene signature for melanoma samples from patients on-treatment with anti-PD-1 in the Riaz entire cohort<sup>18</sup> (left; DC,  $n=27$  patients; PD,  $n=21$  patients) or in patients who received prior treatment with ipilimumab (right; DC,  $n=18$  patients; PD,  $n=11$  patients). Two-tailed Mann Whitney U test was performed to determine statistical difference between the response groups. Dot, single tumor; hinges, 25<sup>th</sup> and 75<sup>th</sup> percentiles; middle line, median; whiskers, minimum to maximum value; ns, not significant. **f** Scatter plot of stroma vs. proliferation score in pCR (green,  $n=6$  samples) and NR (orange,  $n=11$  samples) melanoma patients from the MDACC cohort at the time of surgery. Circle, single tumor.
